# Supplementary material for: High diagnostic performance of independent alpha-synuclein seed amplification assays for detection of early Parkinson’s disease
Source: PubMed Central journal article supplement (PMC8572469; doi:10.1186/s40478-021-01282-8), 2021-11-06
Supplement: 40478_2021_1282_MOESM1_ESM.pdf [file 40478_2021_1282_MOESM1_ESM.pdf]

---

## High diagnostic performance of independent alpha-synuclein seed amplification assays for detection of early Parkinson's disease

Marco J. Russo<sup>1\*</sup>, Christina D. Orru<sup>2\*</sup>, Luis Concha-Marambio<sup>3\*‡</sup>, Simone Gaiasi<sup>4\*</sup>, Bradley R. Groveman<sup>2</sup>, Carly M. Farris<sup>3</sup>, Bret Holguin<sup>3</sup>, Andrew G. Hughson<sup>2</sup>, David-Erick LaFontant<sup>5</sup>, Chelsea Caspell-Garcia<sup>5</sup>, Christopher S. Coffey<sup>5</sup>, Jennifer Mollon<sup>4</sup>, Samantha J. Hutten<sup>6</sup>, Kalpana Merchant<sup>7</sup>, Roland G. Heym<sup>4‡</sup>, Claudio Soto<sup>3,8‡</sup>, Byron Caughey<sup>2‡</sup>, Un Jung Kang<sup>1‡</sup>.

\*Authors contributed equally.

---

### Supplementary Information

#### Supplementary Tables 1-4

Table S1. Demographic and clinical data for randomly selected cohorts.

Table S2. Clinical features of PD subjects with negative/inconclusive  $\alpha$ Syn-SAA results.

Table S3. Clinical features of HC subjects with positive  $\alpha$ Syn-SAA results.

Table S4. Clinical features of SWEDD subjects with positive  $\alpha$ Syn-SAA results.

#### Supplementary Figures 1-6

Figure S1. Raw numbers of positive, negative, or inconclusive  $\alpha$ Syn-SAA results by three laboratories. Figure S2. Variability of  $\alpha$ Syn-SAA fluorescence kinetic parameters.

Figure S3. Correlations of SAA kinetic parameters to clinical, imaging, and biomarker data.

Figure S4. End-point dilution  $\alpha$ Syn-SAA comparison to clinical data.

Figure S5. End-point dilution SD50 relationship to other  $\alpha$ Syn-SAA kinetic parameters.

Figure S6. SD50 correlations to clinical data for PPMI and BioFIND subjects.

**Table S1**

|                         | PD             |                |          | Healthy Controls |                |          | SWEDD          |                |          |
|-------------------------|----------------|----------------|----------|------------------|----------------|----------|----------------|----------------|----------|
|                         | SAA Cohort     | PPMI           | <i>p</i> | SAA Cohort       | PPMI           | <i>p</i> | SAA Cohort     | PPMI           | <i>p</i> |
| <b>n</b>                | 28             | 421            |          | 30               | 196            |          | 18             | 62             |          |
| Age (years)             | 62.1 (9.3)     | 61.7 (9.7)     | 0.803    | 63.8 (10.6)      | 60.8 (11.2)    | 0.167    | 59.6 (10.6)    | 61.3 (10.0)    | 0.519    |
| Gender (M/F)            | 19 / 9         | 275 / 146      | 0.798    | 18 / 12          | 126 / 70       | 0.651    | 12 / 6         | 39 / 23        | 0.823    |
| Duration (months)       | 9.0 (8.4)      | 6.7 (6.5)      | 0.075    | -                | -              | -        | 8.1 (6.4)      | 6.8 (7.2)      | 0.392    |
| Age (onset)             | 60.0 (9.2)     | 59.7 (10.0)    | 0.843    | -                | -              | -        | 57.1 (10.6)    | 59.2 (10.5)    | 0.418    |
| Age (diagnosis)         | 61.4 (9.1)     | 61.1 (9.7)     | 0.882    | -                | -              | -        | 59.0 (11.0)    | 60.7 (10.2)    | 0.499    |
| H&Y Stage               | 1.6 (0.5)      | 1.6 (0.5)      | 0.444    | -                | -              | -        | 1.3 (0.5)      | 1.5 (0.5)      | 0.143    |
| UPDRS Part 3            | 20.5 (8.6)     | 20.9 ± 8.9     | 0.821    | 2.6 (3.6)        | 1.2 (2.2)      | 0.003    | 12.1 (9.4)     | 14.4 (9.9)     | 0.311    |
| UPDRS Total             | 33.9 (13.9)    | 32.4 (13.1)    | 0.559    | 6.5 (5.5)        | 4.6 (4.4)      | 0.031    | 28.1 (16.1)    | 28.5 (17.5)    | 0.936    |
| UPSIT Score             | 22.5 (8.1)     | 22.4 (8.2)     | 0.927    | 35.4 (3.7)       | 34.0 (4.9)     | 0.126    | 32.7 (7.2)     | 31.3 (6.3)     | 0.450    |
| RBD Score               | 4.8 (2.6)      | 4.1 (2.7)      | 0.206    | 3.1 (1.9)        | 2.8 (2.3)      | 0.581    | 3.7 (2.2)      | 4.6 (2.9)      | 0.108    |
| SCOPA-AUT               | 11.0 (6.7)     | 9.5 (6.2)      | 0.232    | 6.3 (4.1)        | 5.8 (3.7)      | 0.523    | 14.5 (7.8)     | 14.0 (8.9)     | 0.796    |
| MoCA Score              | 27.0 (2.2)     | 27.1 (2.3)     | 0.717    | 27.9 (1.0)       | 28.2 (1.1)     | 0.169    | 27.9 (1.7)     | 27.0 (2.4)     | 0.886    |
| DAT SBR<br>Mean Caudate | 1.9 (0.6)      | 2.0 (0.6)      | 0.432    | 2.8 (0.6)        | 3.0 (0.6)      | 0.171    | 3.1 (0.6)      | 2.9 (0.6)      | 0.259    |
| DAT SBR<br>Mean Putamen | 0.7 (0.2)      | 0.8 (0.3)      | 0.141    | 1.9 (0.5)        | 2.1 (0.6)      | 0.211    | 2.2 (0.5)      | 2.1 (0.5)      | 0.327    |
| CSF Aβ (pg/ml)          | 854.4 (356.2)  | 909.6 (410.7)  | 0.489    | 926.6 (443.1)    | 1019.4 (499.5) | 0.399    | 990.4 (382.4)  | 952.9 (354.4)  | 0.208    |
| CSF αSyn (pg/ml)        | 1449.1 (723.2) | 1506.7 (666.6) | 0.66     | 1709.9 (788.4)   | 1695.2 (747.4) | 0.921    | 1652.9 (830.1) | 1678.8 (725.1) | 0.651    |
| CSF tau (pg/ml)         | 179.0 (61.8)   | 169.5 (56.8)   | 0.411    | 204.2 (104.1)    | 191.6 (79.3)   | 0.441    | 174.8 (62.0)   | 179.8 (60.0)   | 0.678    |
| CSF p-tau (pg/ml)       | 15.9 (6.6)     | 14.9 (5.2)     | 0.364    | 19.5 (12.8)      | 17.5 (8.3)     | 0.281    | 15.2 (5.2)     | 15.7 (6.0)     | 0.686    |
| CSF NfL (pg/ml)         | 101.1 (45.0)   | 102.3 (57.2)   | 0.922    | 118.4 (50.2)     | 98.7 (55.1)    | 0.133    | -              | -              | -        |

**Table S1.** Demographic, clinical, imaging, and biomarker data were reviewed for the cohorts tested in this study, which were randomly selected from the larger PPMI study population. Data for each cohort are presented as mean (SD) alongside the parent population from which they were selected. We did not observe statistically significant differences between the smaller subset and the remaining population (*p* value for 2-sided t-test is shown), with exception of small difference for UPDRS Part 3 healthy controls ( $3.1 \pm 1.9$  vs.  $2.8 \pm 2.3$ ). Note that the 2 PD and 2 SWEDD subjects who had diagnoses changed during the study were removed from this table. There were no significant differences between the HC and PD tested cohorts for age ( $p = 0.517$ ) or gender ( $p = 0.542$ ). PD and SWEDD tested cohorts were balanced for age ( $p = 0.317$ ), gender ( $p = 0.775$ ), duration ( $p = 0.775$ ), age of onset ( $p = 0.238$ ), or age of diagnosis ( $p = 0.334$ ).

Table S2

|                    |             | 3018                |        |                     | 3020   |                     |        | 3086                |        |                     | 3119   |                     |        | 3134                |        |                     | 4103   |                      |        | 3666        |        |          | 3027    |      |        | 3212 |     |     |
|--------------------|-------------|---------------------|--------|---------------------|--------|---------------------|--------|---------------------|--------|---------------------|--------|---------------------|--------|---------------------|--------|---------------------|--------|----------------------|--------|-------------|--------|----------|---------|------|--------|------|-----|-----|
| Diagnosis          |             | PD                  |        |                     | PD     |                     |        | PD                  |        |                     | PD     |                     |        | PD                  |        |                     | PD     |                      |        | PD → Not PD |        |          | PD →MSA |      |        |      |     |     |
|                    |             | Abb                 | Amp    | Cau                 | Abb    | Amp                 | Cau    | Abb                 | Amp    | Cau                 | Abb    | Amp                 | Cau    | Abb                 | Amp    | Cau                 | Abb    | Amp                  | Cau    | Abb         | Amp    | Cau      | Abb     | Amp  | Cau    | Abb  | Amp | Cau |
| SAA Result         | BL          | ⊕                   | ⊕      | ⊖                   | ⊖      | ⊖                   | ⊖      | ⊖                   | ⊖      | ⊕                   | ⊕      | ⊖                   | ⊕      | ⊕                   | ⊕      | ⊕                   | ⊖      | ⊕                    | ⊖      | ⊕           | ⊕      | ⊖        | ⊖       | ⊖    | ⊖      | ⊖    | ⊖   | ⊖   |
|                    | Y3          | ⊕                   | ⊕      | ⊕                   | ⊖      | ⊖                   | ⊖      | ⊕                   | ⊕      | ⊕                   | ⊕      | ⊕                   | ⊕      | ⊕                   | ⊕      | ⊖                   | ⊖      | ⊕                    | ⊕      | ⊕           | ⊕      | ⊖        | ⊖       | ⊖    | ⊖      | ⊖    | ⊖   | ⊖   |
| DaTScan            |             | Positive            |        | Positive            |        | Positive            |        | Positive            |        | Positive            |        | Positive            |        | Positive            |        | Positive            |        | Positive             |        | Positive    |        | Positive |         |      |        |      |     |     |
|                    |             | ipsi                | contra | ipsi                | contra | ipsi                | contra | ipsi                | contra | ipsi                | contra | ipsi                | contra | ipsi                | contra | ipsi                | contra | ipsi                 | contra | ipsi        | contra | ipsi     | contra  | ipsi | contra |      |     |     |
|                    | Caudate SBR | 1.96                | 1.58   | 1.92                | 1.54   | 2.52                | 2.21   | 1.84                | 1.75   | 1.93                | 1.42   | 2.30                | 2.3    | 1.63                | 1.39   | 2.88                | 2.74   | 1.7                  | 1.41   |             |        |          |         |      |        |      |     |     |
|                    | Putamen SBR | 0.60                | 0.37   | 0.83                | 0.82   | 1.22                | 0.88   | 0.51                | 0.37   | 1.06                | 0.66   | 1.17                | 0.67   | 0.79                | 0.51   | 1.88                | 1.28   | 0.73                 | 0.42   |             |        |          |         |      |        |      |     |     |
|                    | Age/Gender  | 61 M                |        | 74 M                |        | 56 M                |        | 64 F                |        | 39 F                |        | 59 F                |        | 52 F                |        | 70 F                |        | 56 F                 |        |             |        |          |         |      |        |      |     |     |
|                    | Onset Age   | 60                  |        | 70                  |        | 54                  |        | 62                  |        | 38                  |        | 58                  |        | 45                  |        | 68                  |        | 55                   |        |             |        |          |         |      |        |      |     |     |
|                    | BL          | 19                  |        | 20                  |        | 7                   |        | 25                  |        | 8                   |        | 7                   |        | 15                  |        | 23                  |        | 18                   |        |             |        |          |         |      |        |      |     |     |
| UPDRS Part 3 (off) | Y3          | 38                  |        | 45                  |        | 13                  |        | 33                  |        | 29                  |        | 18                  |        | 24                  |        | 26                  |        | 52                   |        |             |        |          |         |      |        |      |     |     |
|                    | Δ           | +19                 |        | +25                 |        | +6                  |        | +8                  |        | +21                 |        | +11                 |        | +9                  |        | +3                  |        | +34                  |        |             |        |          |         |      |        |      |     |     |
|                    | BL          | 31                  |        | 45                  |        | 15                  |        | 38                  |        | 12                  |        | 12                  |        | 52                  |        | 40                  |        | 39                   |        |             |        |          |         |      |        |      |     |     |
| UPDRS Total (off)  | Y3          | 57                  |        | 83                  |        | 34                  |        | 48                  |        | 35                  |        | 37                  |        | 45                  |        | 48                  |        | 87                   |        |             |        |          |         |      |        |      |     |     |
|                    | Δ           | +26                 |        | +38                 |        | +19                 |        | +10                 |        | +23                 |        | +25                 |        | -7                  |        | +8                  |        | +48                  |        |             |        |          |         |      |        |      |     |     |
|                    | RBD         | Negative (3)<br>Q6+ |        | Positive (6)<br>Q6+ |        | Positive (5)<br>Q6+ |        | Negative (4)<br>Q6+ |        | Positive (8)<br>Q6+ |        | Positive (5)<br>Q6- |        | Positive (5)<br>Q6+ |        | Positive (7)<br>Q6+ |        | Positive (10)<br>Q6+ |        |             |        |          |         |      |        |      |     |     |
|                    | SCOPA-AUT   | 8                   |        | 17                  |        | 10                  |        | 6                   |        | 5                   |        | 3                   |        | 15                  |        | 16                  |        | 15                   |        |             |        |          |         |      |        |      |     |     |
|                    | UPSIT       | 26<br>Hyposmia      |        | 26<br>Hyposmia      |        | 15<br>Anosmia       |        | 30<br>Hyposmia      |        | 31<br>Hyposmia      |        | 32<br>Hyposmia      |        | 38<br>Normosmia     |        | 30<br>Hyposmia      |        | 35<br>Normosmia      |        |             |        |          |         |      |        |      |     |     |
|                    | MoCA        | 23                  |        | 28                  |        | 24                  |        | 28                  |        | 29                  |        | 27                  |        | 29                  |        | 25                  |        | 23                   |        |             |        |          |         |      |        |      |     |     |
| CSF αSyn [pg/ml]   | BL          | 1379.8              |        | 2348.6              |        | 1156.4              |        | 1220.8              |        | 2028.2              |        | 2030.4              |        | 1509.5              |        | 1903.4              |        | 978.3                |        |             |        |          |         |      |        |      |     |     |
|                    | Y3          | na                  |        | 1977.8              |        | na                  |        | 1368.1              |        | na                  |        | 1813.2              |        | na                  |        | na                  |        | 916.3                |        |             |        |          |         |      |        |      |     |     |
| CSF NfL [pg/ml]    | BL          | na                  |        | 166.4               |        | 71.92               |        | 48.42               |        | na                  |        | 83.62               |        | 89.99               |        | 159.4               |        | 113.4                |        |             |        |          |         |      |        |      |     |     |
|                    | Y3          | na                  |        | na                  |        | na                  |        | 44.26               |        | na                  |        | 97.63               |        | na                  |        | na                  |        | 277.0                |        |             |        |          |         |      |        |      |     |     |

**Table S2.** Clinical features of PD subjects with negative/inconclusive αSyn-SAA results by at least one assay. Data for all PD diagnoses during this study (and unanimously negative SAA) are also presented in rightmost columns (#3027 and #3212)

**Table S3**

|                  |    | 3053                |      |     | 3074                |      |     | 3112                |      |     | 3264                |      |     |
|------------------|----|---------------------|------|-----|---------------------|------|-----|---------------------|------|-----|---------------------|------|-----|
| Group            |    | HC                  |      |     | HC                  |      |     | HC                  |      |     | HC                  |      |     |
|                  |    | Abb                 | Amp  | Cau | Abb                 | Amp  | Cau | Abb                 | Amp  | Cau | Abb                 | Amp  | Cau |
| SAA Result       | BL | ⊖                   | ⊖    | ⊖   | ⊖                   | ⊖    | ⊖   | ⊖                   | ⊖    | ⊖   | ⊖                   | ⊕    | ⊕   |
|                  | Y3 | ⊖                   | ⊖    | ⊕   | ⊕                   | ⊖    | ⊖   | ⊖                   | ⊕    | ⊖   | ⊕                   | ⊕    | ⊖   |
| DaTScan          |    | Negative            |      |     | Negative            |      |     | Negative            |      |     | Negative            |      |     |
|                  |    | R                   | L    |     | R                   | L    |     | R                   | L    |     | R                   | L    |     |
| Caudate SBR      |    | 2.11                | 2.26 |     | 2.57                | 2.54 |     | 2.48                | 2.76 |     | 3.25                | 3.02 |     |
| Putamen SBR      |    | 1.15                | 1.58 |     | 1.38                | 2.02 |     | 1.77                | 1.56 |     | 2.5                 | 2.34 |     |
| Age/Gender       |    | 69 F                |      |     | 31 F                |      |     | 63 M                |      |     | 60 M                |      |     |
| UPDRS Part 3     |    | BL                  |      |     | Y3                  |      |     | Δ                   |      |     | BL                  |      |     |
|                  |    | 3                   |      |     | 1                   |      |     | 0                   |      |     | 0                   |      |     |
|                  |    | 3                   |      |     | 0                   |      |     | 0                   |      |     | 3                   |      |     |
|                  |    | 0                   |      |     | -1                  |      |     | 0                   |      |     | +3                  |      |     |
| UPDRS Total      |    | BL                  |      |     | Y3                  |      |     | Δ                   |      |     | BL                  |      |     |
|                  |    | 4                   |      |     | 3                   |      |     | 0                   |      |     | 7                   |      |     |
|                  |    | 4                   |      |     | 0                   |      |     | 0                   |      |     | 5                   |      |     |
|                  |    | 0                   |      |     | -3                  |      |     | 0                   |      |     | -2                  |      |     |
| RBD              |    | Negative (2)<br>Q6- |      |     | Negative (4)<br>Q6+ |      |     | Negative (0)<br>Q6- |      |     | Positive (5)<br>Q6+ |      |     |
| SCOPA-AUT        |    | 3                   |      |     | 1                   |      |     | 7                   |      |     | 8                   |      |     |
| UPSIT            |    | 34<br>Hyposmia      |      |     | 39<br>Normosmia     |      |     | 37<br>Normosmia     |      |     | 37<br>Normosmia     |      |     |
| MoCA             |    | 29                  |      |     | 28                  |      |     | 30                  |      |     | 29                  |      |     |
| CSF αSyn [pg/ml] |    | 1381.4              |      |     | 844.6               |      |     | 1522                |      |     | 1702.6              |      |     |
| CSF NfL [pg/ml]  |    | 172.1               |      |     | 23.07               |      |     | na                  |      |     | na                  |      |     |

**Table S3.** Healthy controls with positive αSyn-SAA results. Clinical features of healthy control subjects who had positive SAA results by at least one assay and one time point. Three of these (#3053, #3074, and #3112) had only single positive SAA result. Another subject was positive for RBD with SCOPA-AUT > 7, suggesting possible prodromal state.

**Table S4**

| Group              | 3082                |        |     | 3256                |        |     | 3319                |        |     | 3384                |        |     | 3050               |        |     | 3101                |        |     |
|--------------------|---------------------|--------|-----|---------------------|--------|-----|---------------------|--------|-----|---------------------|--------|-----|--------------------|--------|-----|---------------------|--------|-----|
|                    | SWEDD               |        |     | SWEDD               |        |     | SWEDD               |        |     | SWEDD               |        |     | SWEDD→PD           |        |     | SWEDD→PD            |        |     |
|                    | Abb                 | Amp    | Cau | Abb                 | Amp    | Cau | Abb                 | Amp    | Cau | Abb                 | Amp    | Cau | Abb                | Amp    | Cau | Abb                 | Amp    | Cau |
| SAA Result         | ⊕                   | ⊕      | ⊕   | ⊖                   | ⊖      | ⊕   | ⊖                   | ⊖      | ⊖   | ⊖                   | ⊕      | ⊖   | ⊕                  | ⊕      | ⊕   | ⊕                   | ⊕      | ⊕   |
| DaTScan            | Negative            |        |     | Negative            |        |     | Negative            |        |     | Negative            |        |     | Neg → Pos          |        |     | Neg → Pos           |        |     |
|                    | ipsi                | contra |     | ipsi                | contra |     | ipsi                | contra |     | ipsi                | contra |     | ipsi               | contra |     | ipsi                | contra |     |
| Caudate SBR        | 2.39                | 2.11   |     | 3.83                | 3.60   |     | 3.75                | 3.51   |     | 3.72                | 4.12   |     | 2.13               | 1.82   |     | 2.42                | 2.00   |     |
| Putamen SBR        | 1.21                | 1.79   |     | 2.56                | 2.51   |     | 3.08                | 2.53   |     | 2.46                | 3.24   |     | 1.75               | 1.04   |     | 1.43                | 1.02   |     |
| Age/Gender         | 66 M                |        |     | 57 M                |        |     | 53 F                |        |     | 66 F                |        |     | 52 M               |        |     | 50 F                |        |     |
| Onset Age          | 61                  |        |     | 53                  |        |     | 53                  |        |     | 66                  |        |     | 49                 |        |     | 46                  |        |     |
| UPDRS Part 3 (off) | 4                   |        |     | 24                  |        |     | 13                  |        |     | 11                  |        |     | 18                 |        |     | 5                   |        |     |
| UPDRS Total (off)  | 16                  |        |     | 38                  |        |     | 28                  |        |     | 32                  |        |     | 29                 |        |     | 12                  |        |     |
| RBD                | Positive (5)<br>Q6+ |        |     | Negative (3)<br>Q6- |        |     | Negative (3)<br>Q6+ |        |     | Negative (2)<br>Q6- |        |     | Negative(4)<br>Q6- |        |     | Negative (3)<br>Q6- |        |     |
| SCOPA-AUT          | 14                  |        |     | 21                  |        |     | 9                   |        |     | 18                  |        |     | 6                  |        |     | 6                   |        |     |
| UPSIT              | 29                  |        |     | 33                  |        |     | 38                  |        |     | 36                  |        |     | 34                 |        |     | 31                  |        |     |
| MoCA               | 28                  |        |     | 24                  |        |     | 29                  |        |     | 28                  |        |     | 30                 |        |     | 30                  |        |     |
| CSF αSyn [pg/ml]   | 2140.3              |        |     | 4041.4              |        |     | 1387.9              |        |     | 2560                |        |     | 1354.4             |        |     | 1370.2              |        |     |

**Table S4.** SWEDDs with positive αSyn-SAA results. Clinical data for SWEDD subjects with at least one positive/inconclusive SAA result. The two SWEDD subjects with diagnoses revised to PD on the basis of later DAT-SPECT imaging are shown at right (#3050 and #3101).

**Figure S1**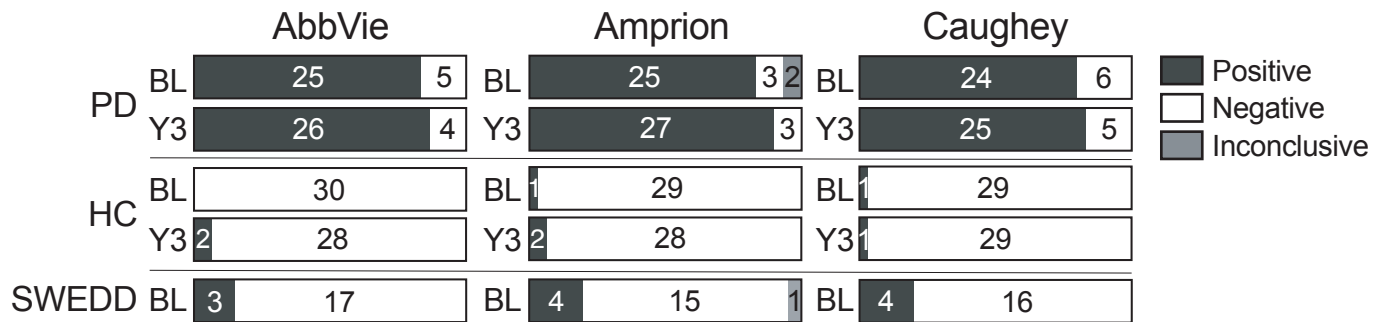

**Fig. S1** Raw numbers of positive, negative, or inconclusive  $\alpha$ Syn-SAA results by all three laboratories for Parkinson's disease (PD), healthy controls (HC), and subjects with scans without evidence of dopaminergic deficit (SWEDD), at baseline (BL) and year 3 (Y3). Note that these numbers include PD and SWEDD subjects with revised diagnoses that were removed from further analysis.

Figure S2

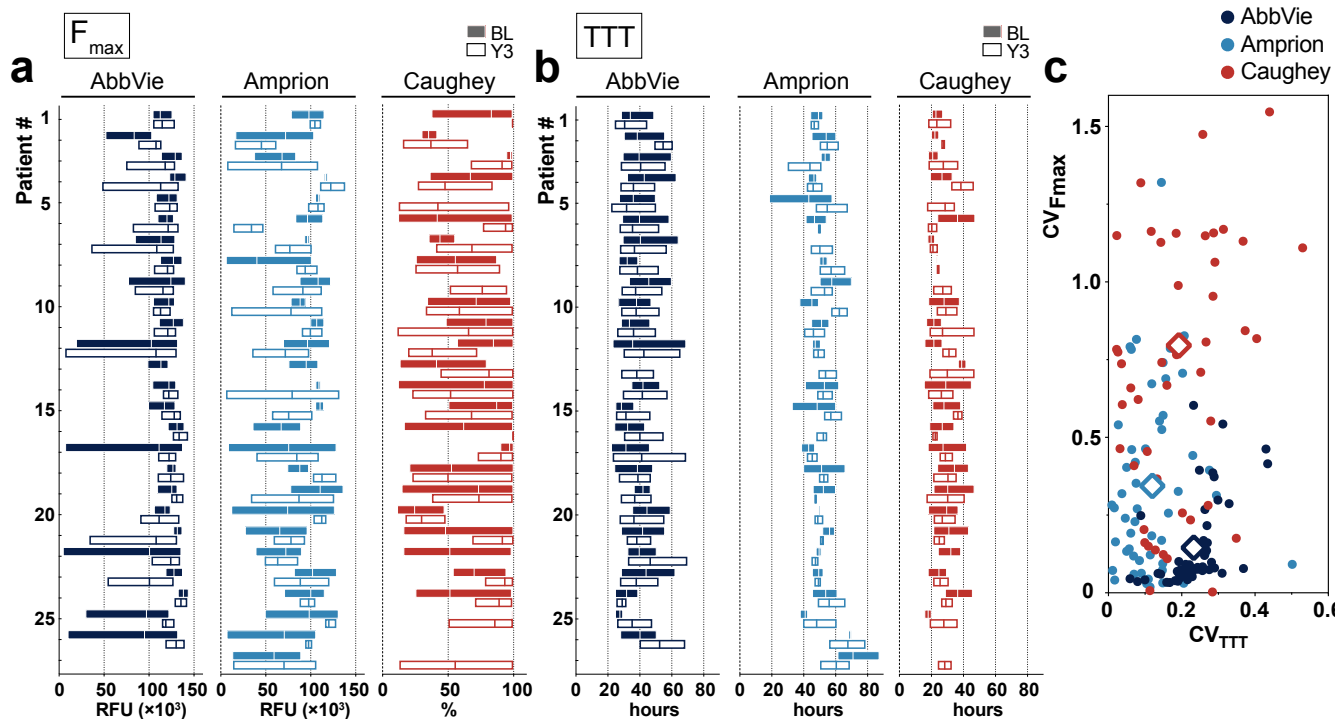

**Fig. S2** Variability of  $\alpha$ Syn-SAA fluorescence kinetic parameters. **a** Mean, maximum, and minimum of  $F_{max}$  obtained for each patient sample, with both BL (filled boxes) and Y3 (open boxes), for each assay. Note that Caughey lab normalized  $F_{max}$  to the maximal fluorescence on each plate, so this is expressed as a percentage of maximum. **b** Mean, maximum, and minimum of time to threshold (TTT) for each patient sample, for each assay. **c** Summary of variability, with  $CV_{F_{max}}$  plotted against  $CV_{TTT}$  for AbbVie, Amprion, and Caughey, with each point representing a different sample (BL and Y3 pooled), and with the centroid for each represented by a diamond ( $CV_{F_{max}}/CV_{TTT}$ , AbbVie: 0.15/0.23; Amprion: 0.34/0.12; Caughey: 0.80/0.19). Note the difference in xy scales.

Figure S3

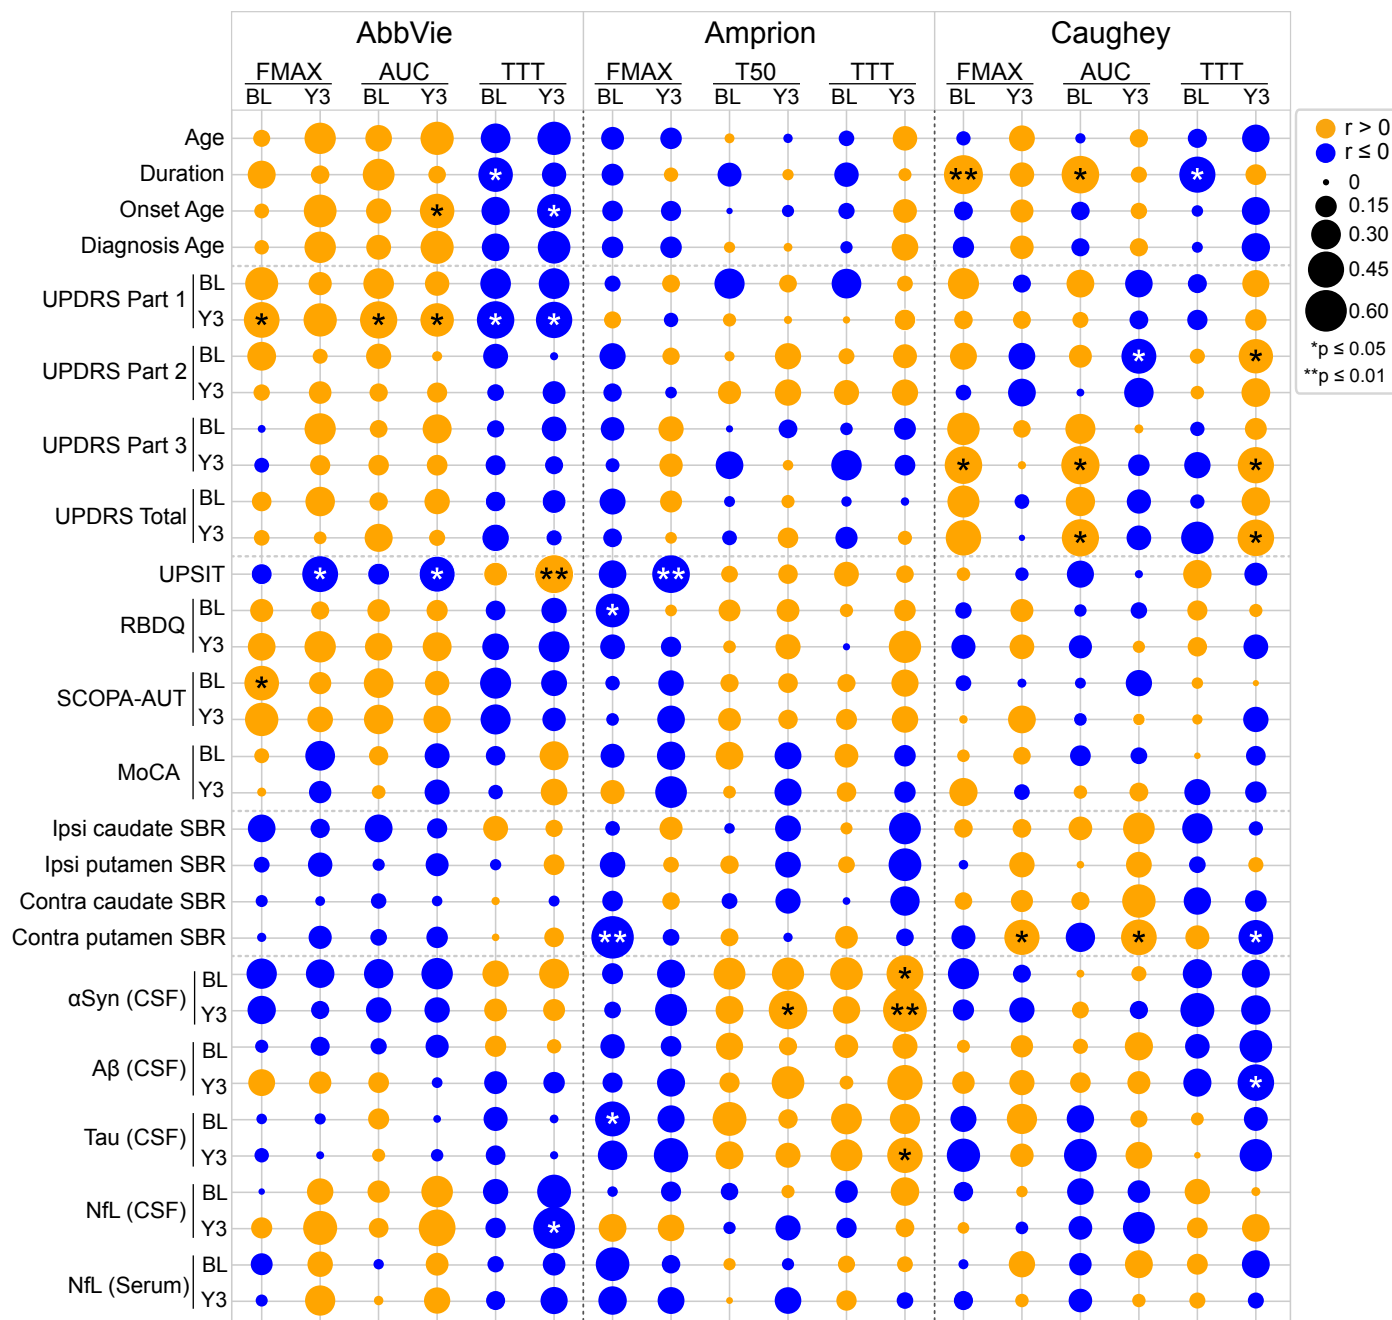

**Fig. S3** Correlations of  $\alpha$ Syn-SAA kinetic parameters to clinical, imaging, and biomarker data. Correlations of maximum fluorescence (F<sub>max</sub>), area under the curve (AUC), time to 50% F<sub>max</sub> (T<sub>50</sub>), and time to threshold (TTT) from all three laboratories to clinical data (age, disease duration, age of onset/diagnosis, UPDRS sub-scores and total, UPSIT, MoCA, SCOPA-AUT, and RBDQ scores), imaging data (DATSCAN specific binding ratio), and biomarkers (A $\beta$ , tau, total  $\alpha$ Syn, and NfL). Diameter of circle at each node is proportional to strength of correlation (r), and the color indicates positive (orange) and negative (blue) correlations (\*\*p ≤ 0.01, \*p ≤ 0.05).



Figure S4

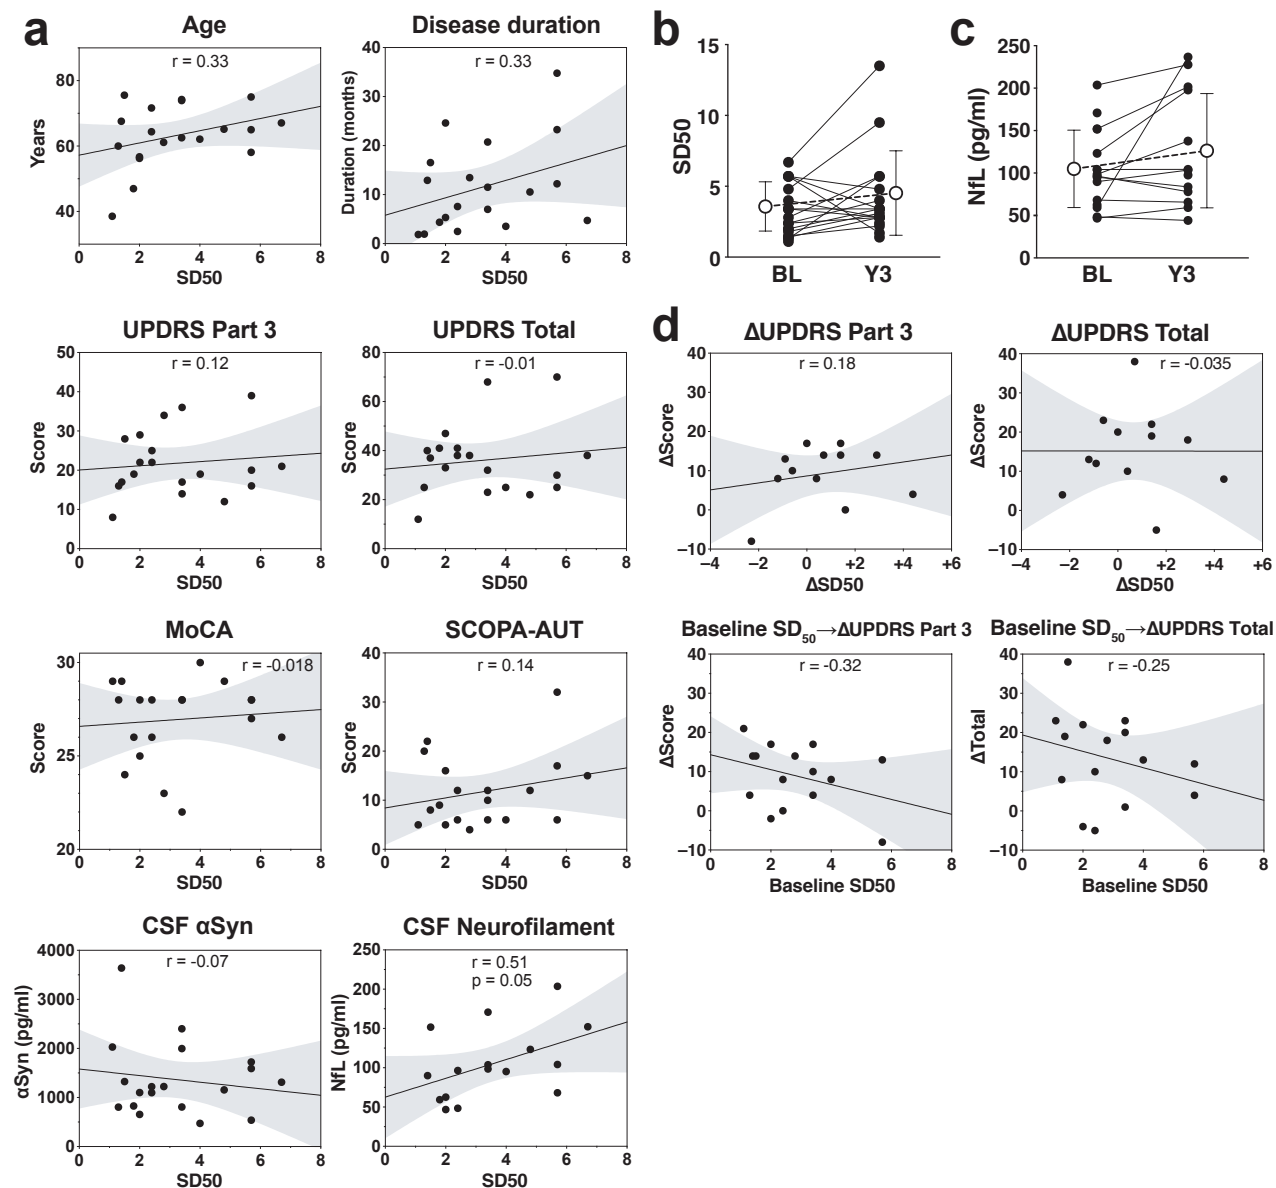

**Fig. S4** End-point dilution SAA comparison to clinical data. **a** End-point dilution achieved for 19 PD samples. Relative concentration of SAA seeds ( $SD_{50}/15 \mu\text{l}$  CSF) is plotted against the age, disease duration (months), UPDRS Part 3 ('off') and total scores, MoCA, SCOPA-AUT, CSF  $\alpha$ Syn and CSF neurofilament light chain (NfL). Correlation coefficients (Spearman  $r$ ) are provided for each plot, and  $p$ -value is indicated only for  $p \leq 0.05$ ). **b**  $SD_{50}$  values at baseline and year 3 (BL:  $3.2 \pm 1.7$ ,  $n=19$ , Y3:  $4.2 \pm 3.0$ ,  $n=18$ , mean  $\pm$  s.d.; n.s.,  $p = 0.13$ , Wilcoxon signed rank test). **c** Baseline and year 3 values for CSF neurofilament light chain, a biomarker that has been shown to correlate to disease progression and severity in other cohorts (BL:  $104.7 \pm 45.5$ ,  $n=16$ ; Y3:  $126.0 \pm 67.2$ ,  $n=13$ , mean  $\pm$  s.d., n.s.,  $p=0.08$ , Wilcoxon signed rank test). **d**  $SD_{50}$  concentration (per  $15 \mu\text{l}$ ) vs. change in motor scores (UPDRS Part 3 and Total).  $\Delta SD_{50}$  is plotted against  $\Delta$ UPDRS Part 3 or Total, and baseline  $SD_{50}$  concentration is plotted against  $\Delta$ UPDRS Part 3 or Total with correlation coefficient indicated for each plot.

## Figure S5

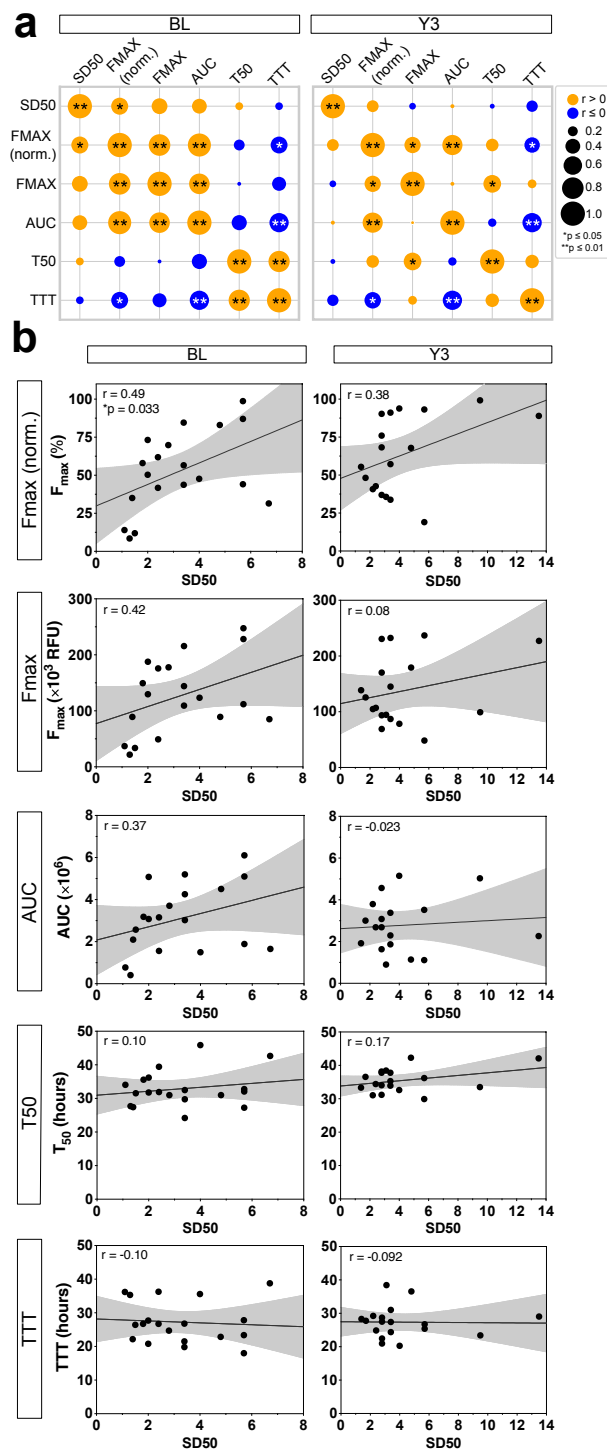

**Fig. S5** End-point dilution SD50 relationship to other  $\alpha$ Syn-SAA kinetic parameters. **a** Summary of SD50 vs. other  $\alpha$ Syn-SAA kinetic parameters at baseline (BL) and year 3 (Y3), with each circle representing Spearman rank correlation and diameter indicating correlation magnitude (orange positive coefficient, and blue negative). **b** Scatter plots of Fmax, AUC, T50, and TTT vs. SD50 at both BL (left) and Y3 (right). Fmax (norm.) is fluorescence normalized to peak maximal fluorescence on plate. Linear best-fit and 95% confidence bands are shown for each pair. Spearman rank coefficient  $r$  is shown for each pair, and  $p$  value is shown if significant at  $p \leq 0.05$ .

Figure S6

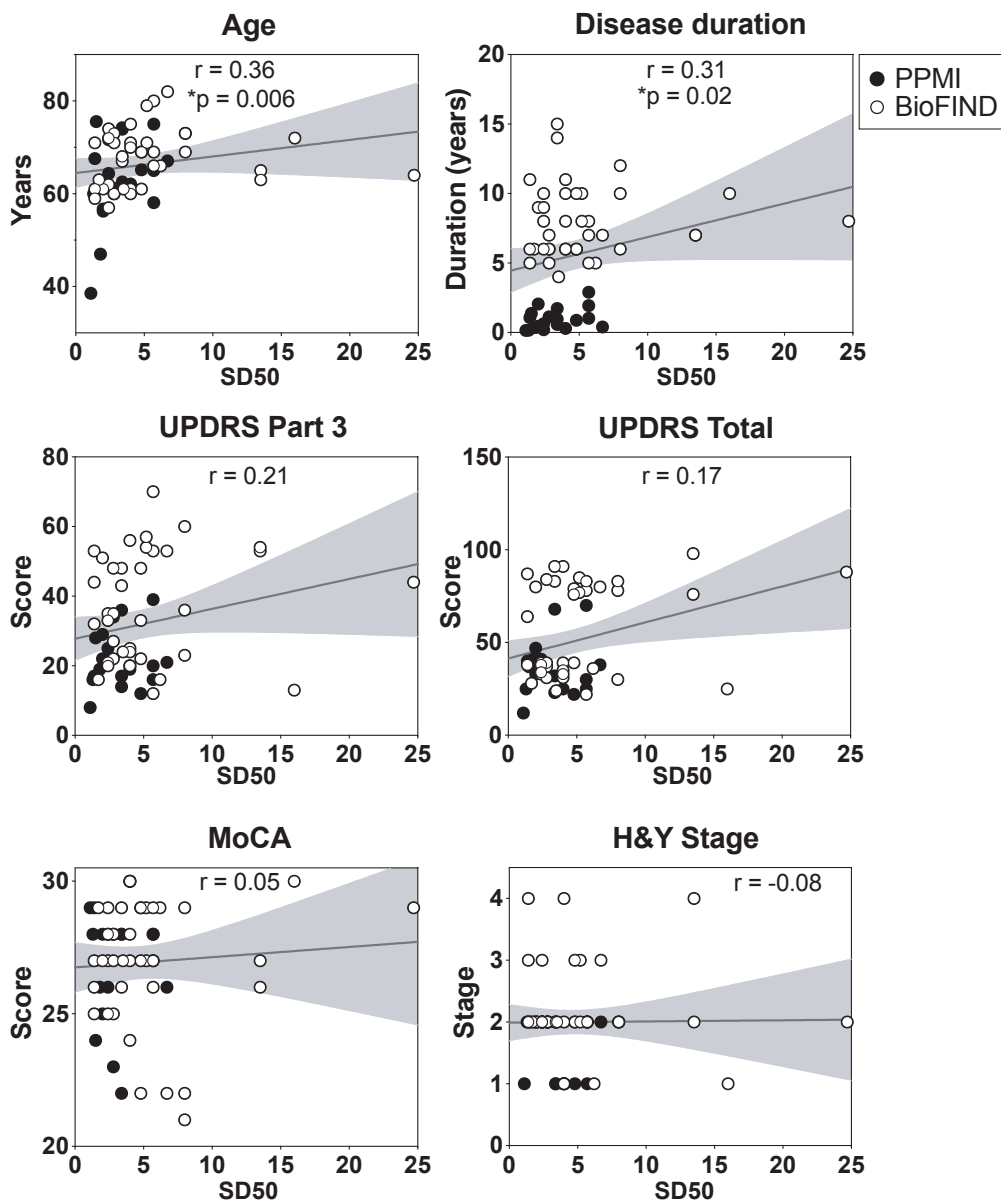

**Fig. S6** SD50 correlations to clinical data for PPMI and BioFIND subjects. End-point dilution was performed on CSF from the BioFIND study, which includes PD subjects with more advanced disease. We asked whether these subjects with overall more severe clinical features, would provide additional power to detect correlations between SD50 and clinical parameters. With the exception of age ( $r = 0.36$ ,  $p = 0.006$ ) and disease duration ( $r = 0.31$ ,  $p = 0.02$ ), we did not observe significant correlations for the pooled PPMI ( $n = 19$ ) and BioFIND subjects ( $n = 38$ ). Note, neurofilament light chain (NfL) data is not available for BioFIND subjects.
